# Supplementary material
Source: PubMed Central journal article supplement (PMC6600805)
Supplement: NIHMS1520849-supplement-1.pdf [file NIHMS1520849-supplement-1.pdf]

## Electronic Supplementary Material

**Method development for the certification of a ginsenoside calibration solution via liquid chromatography with ultraviolet/visible absorbance and mass spectrometric detection**

Walter B. Wilson\* and Lane C. Sander

*Chemical Sciences Division, Material Measurement Laboratory, National Institute of Standards and Technology, Gaithersburg, Maryland 20899.*

**Table S1.** Mobile phase gradient for the preliminary LC/UV separations of 8 ginsenosides.

| Gradient A |                      |         | Gradient B |                      |         |
|------------|----------------------|---------|------------|----------------------|---------|
| Time       | H <sub>2</sub> O (%) | ACN (%) | Time       | H <sub>2</sub> O (%) | ACN (%) |
| -3.0       | 80                   | 20      | -3.0       | 80                   | 20      |
| 0.0        | 80                   | 20      | 0.0        | 80                   | 20      |
| 10.0       | 77                   | 23      | 10.0       | 77                   | 20      |
| 29.0       | 58                   | 42      | 30.0       | 50                   | 50      |
| 30.0       | 0                    | 100     | 31.0       | 0                    | 100     |

  

| Gradient C |                      |         | Gradient D |                      |         |
|------------|----------------------|---------|------------|----------------------|---------|
| Time       | H <sub>2</sub> O (%) | ACN (%) | Time       | H <sub>2</sub> O (%) | ACN (%) |
| -3.0       | 79                   | 21      | -3.0       | 82                   | 18      |
| 0.0        | 79                   | 21      | 0.0        | 82                   | 18      |
| 5.0        | 79                   | 21      | 10.0       | 82                   | 18      |
| 25.0       | 50                   | 50      | 30.0       | 50                   | 50      |
| 30.0       | 0                    | 100     |            |                      |         |

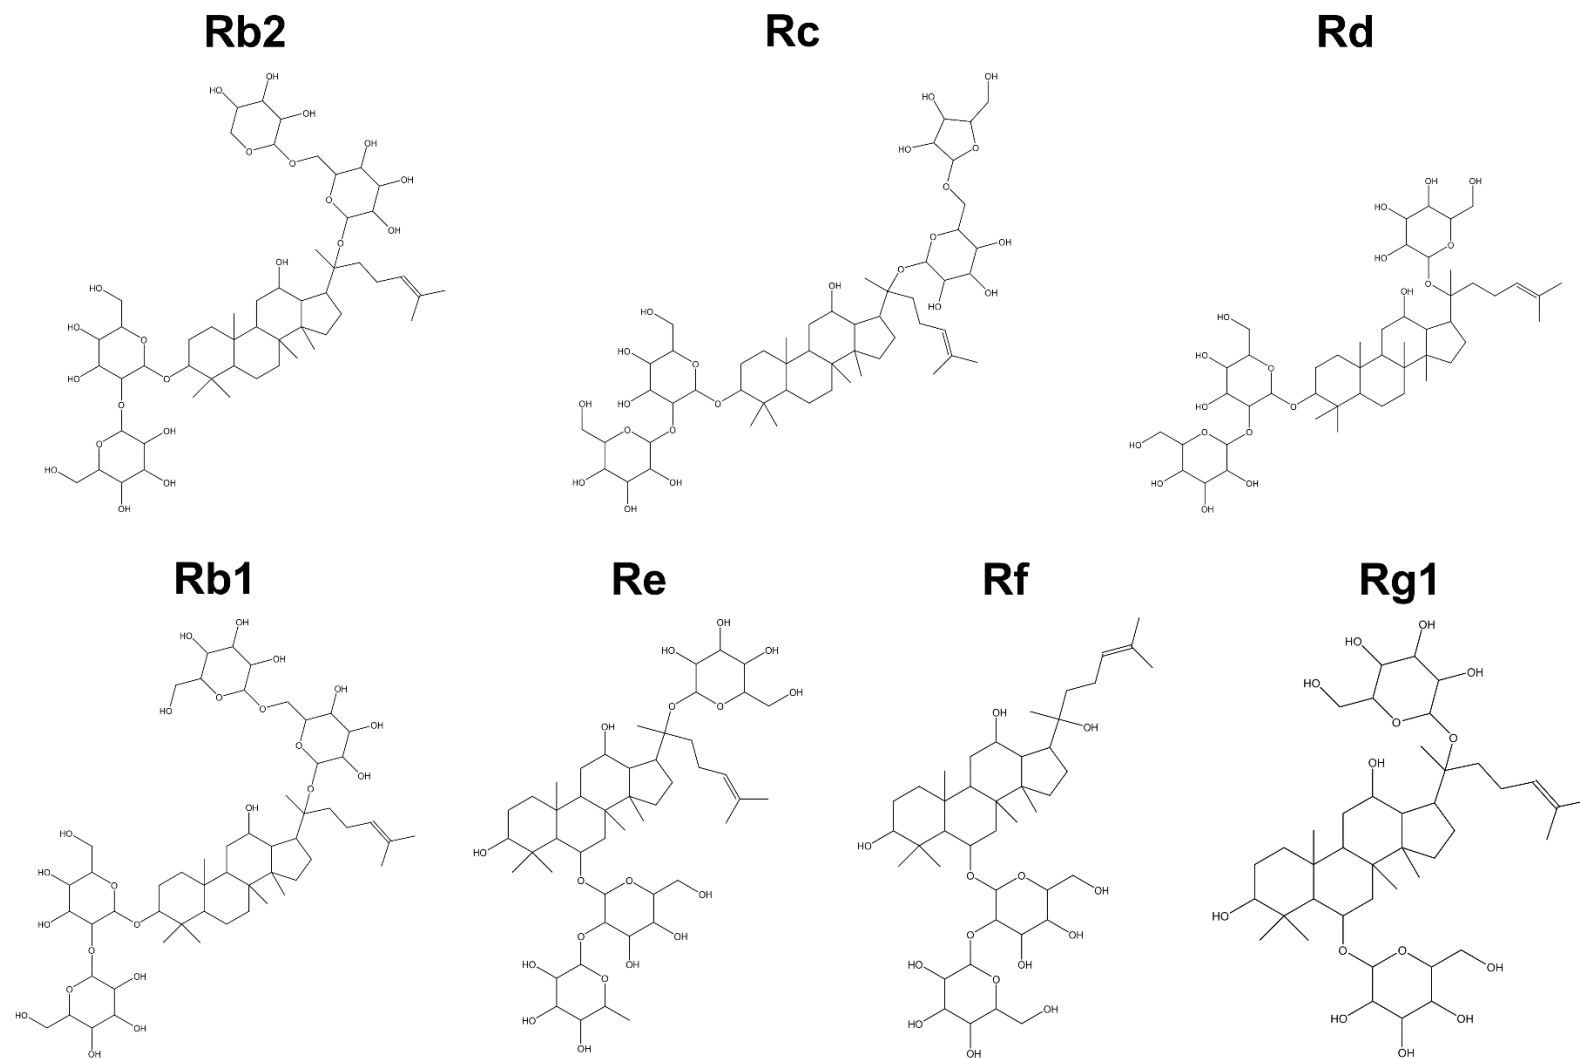

**Fig. S1.** Molecular structures for the seven ginsenosides in SRM 3389.

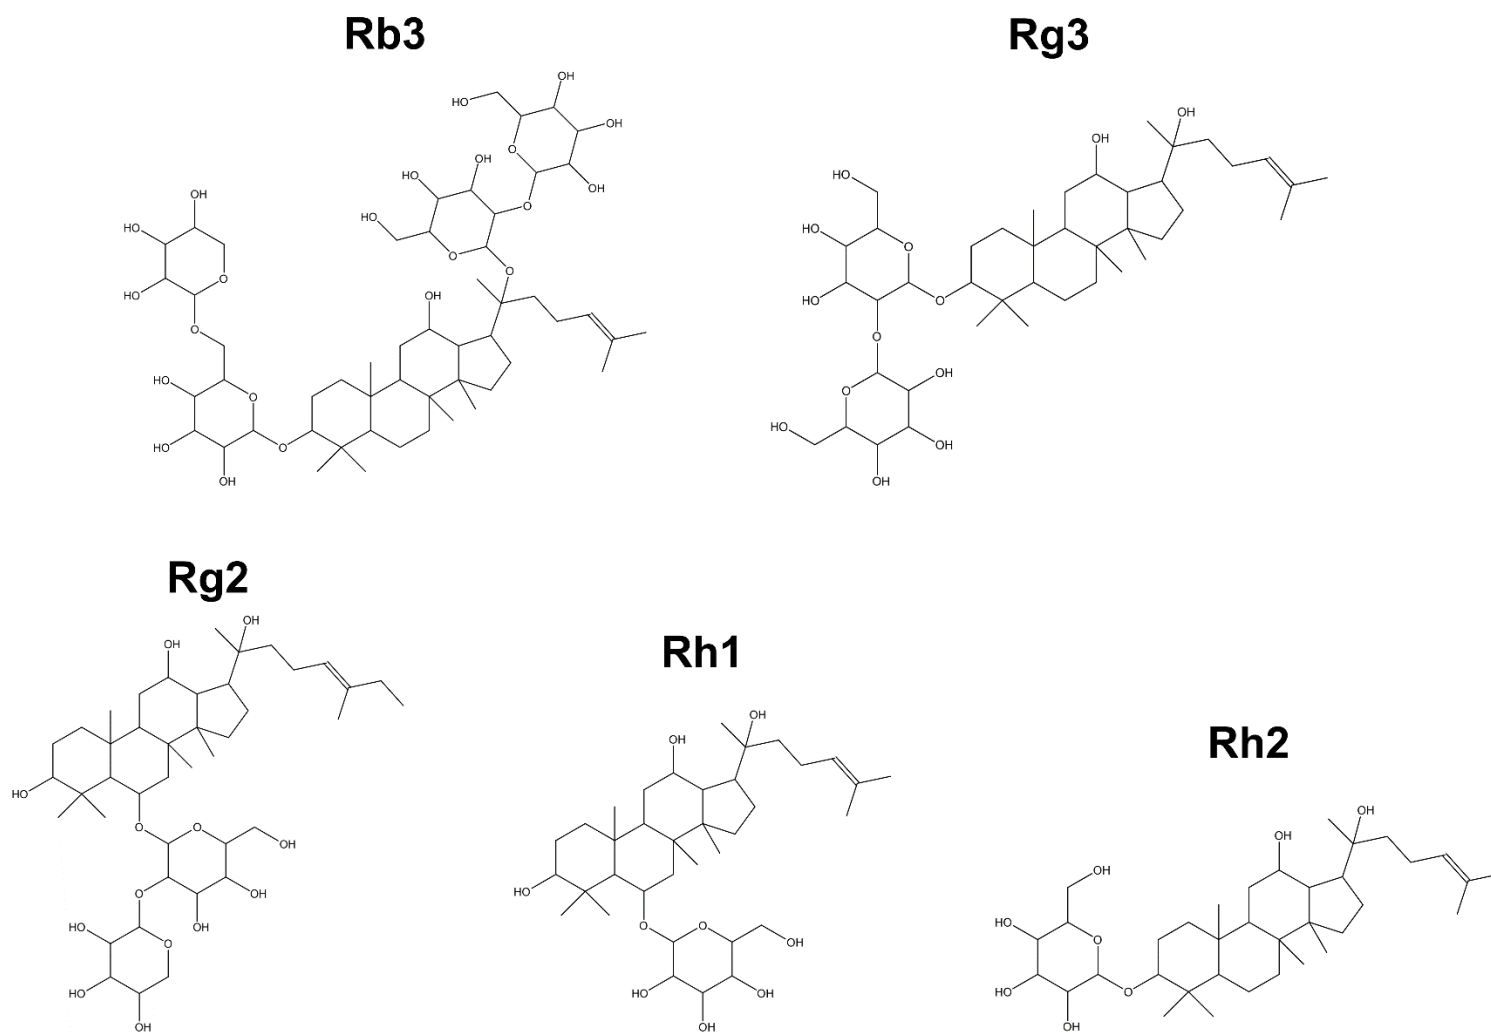

**Fig. S2.** Molecular structures for the five ginsenosides included in the present study not in SRM 3389.

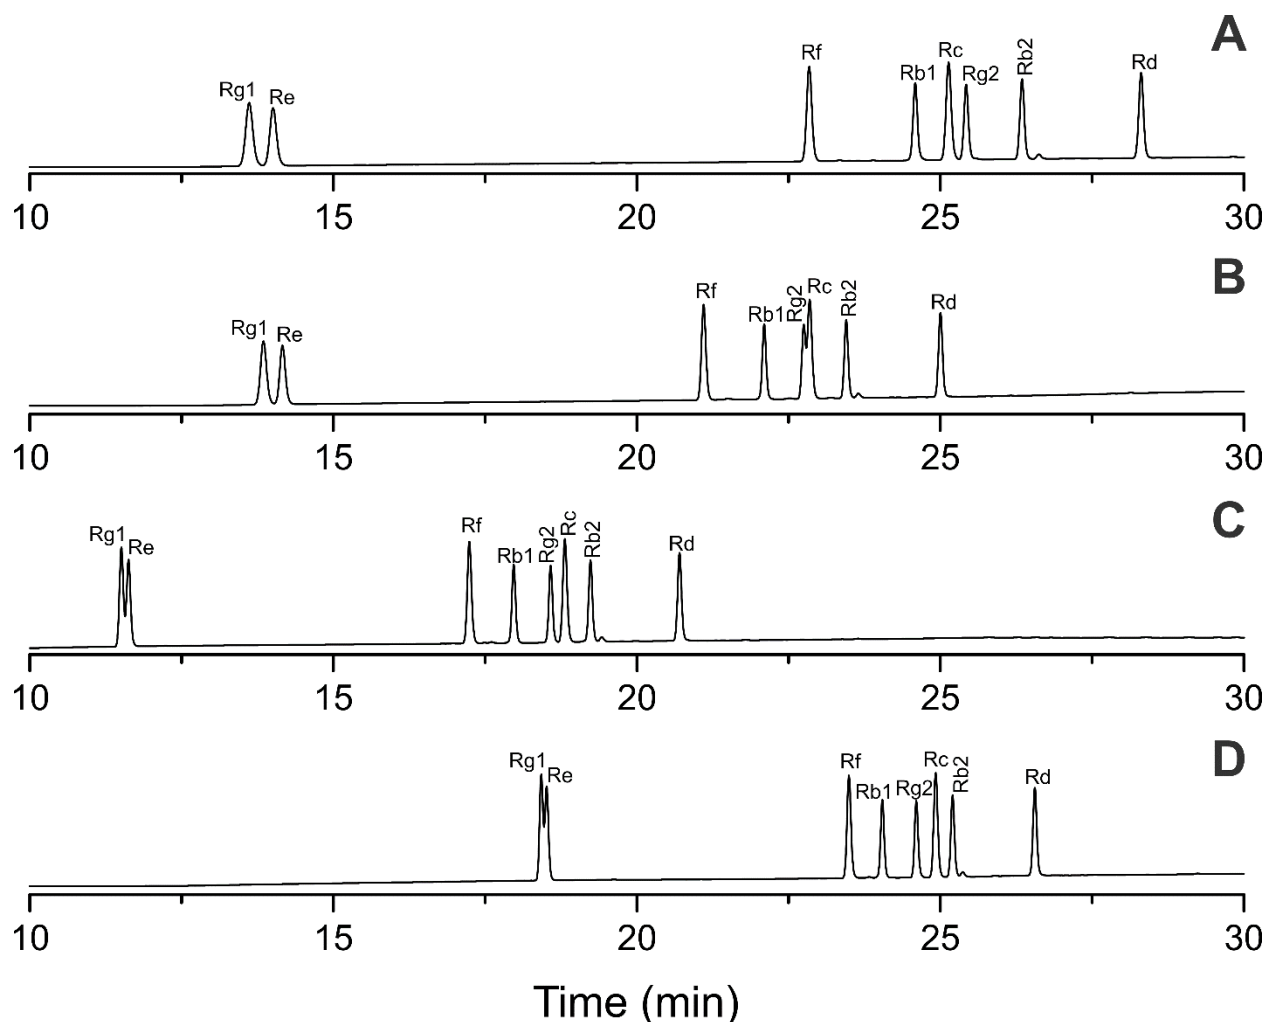

**Fig. S3.** LC separations of an eight ginsenoside mixture under the following mobile phase programs using H<sub>2</sub>O and ACN: (A) linear gradient from 20 % ACN to 23 % ACN over 10 min and linear gradient to 42 % ACN over 19 min; (B) linear gradient from 20 % ACN to 23 % ACN over 10 min and linear gradient to 50 % ACN over 20 min; (C) isocratic at 21 % ACN for 5 min, linear gradient to 50 % ACN over 20 min, and linear gradient to 100 % ACN over 5 min; (D) isocratic at 18 % ACN for 10 min and linear gradient to 50 % ACN over 20 min.

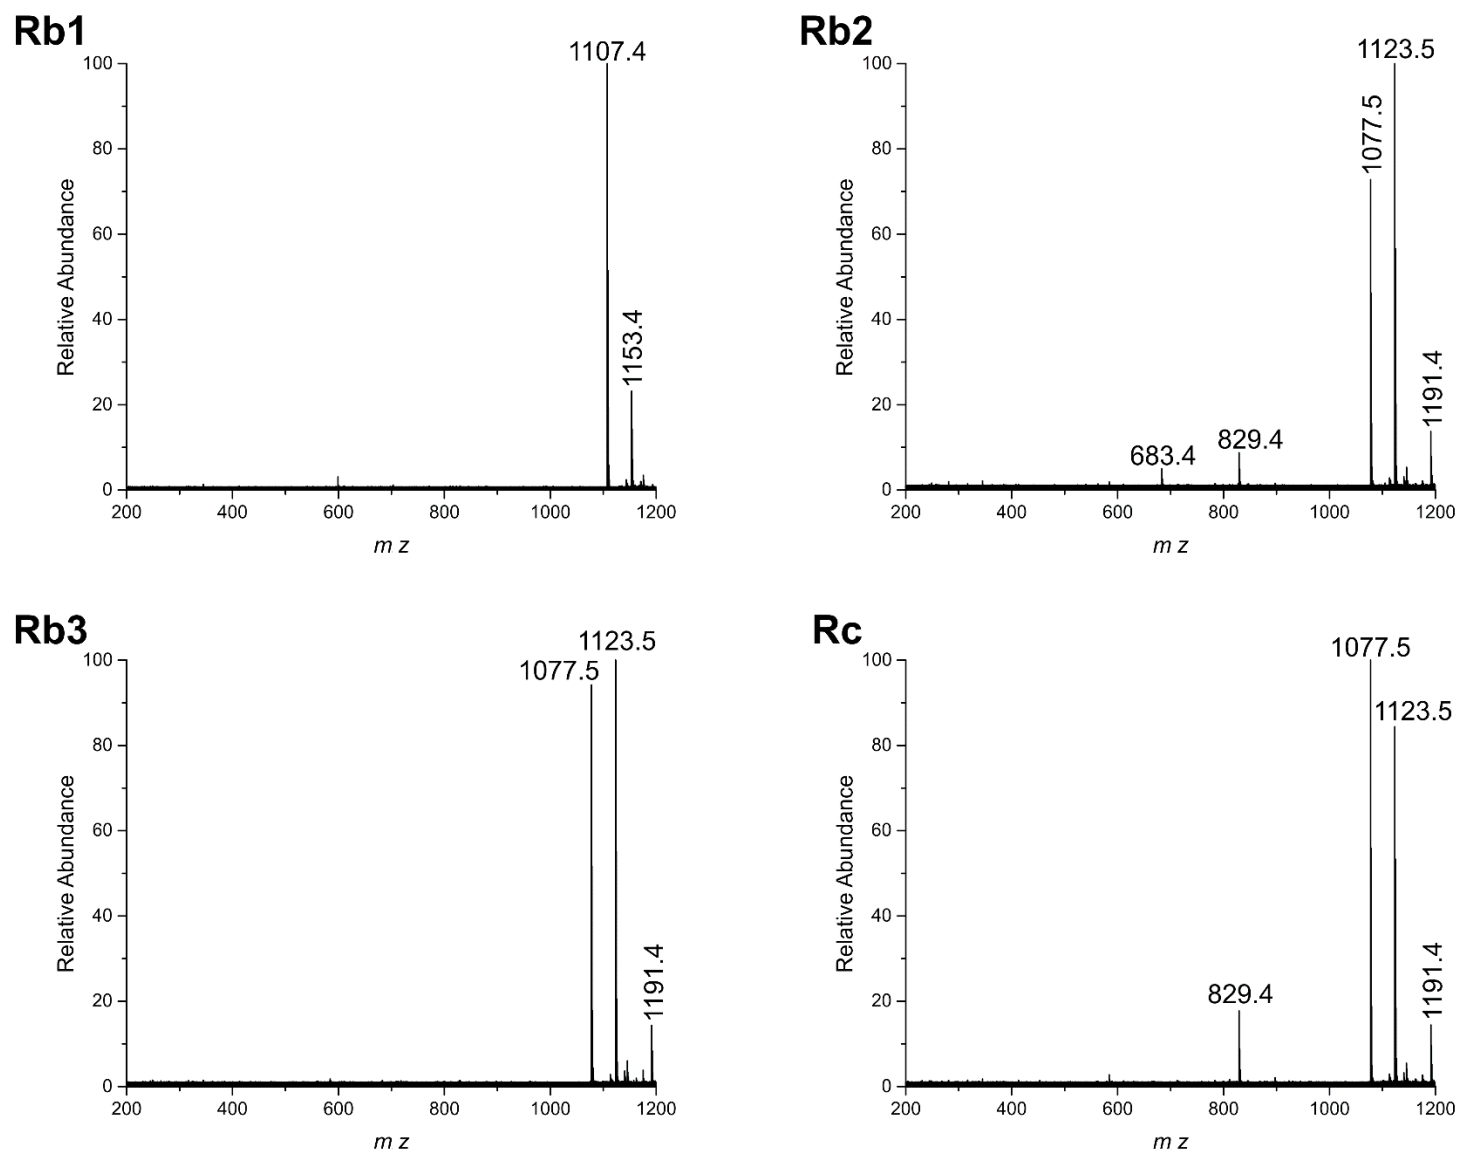

**Fig. S4.** Mass spectra of ginsenoside Rb1 (1101.31 g/mol), Rb2 (1079.29 g/mol), Rb3 (1079.29 g/mol), and Rc (1079.29 g/mol).

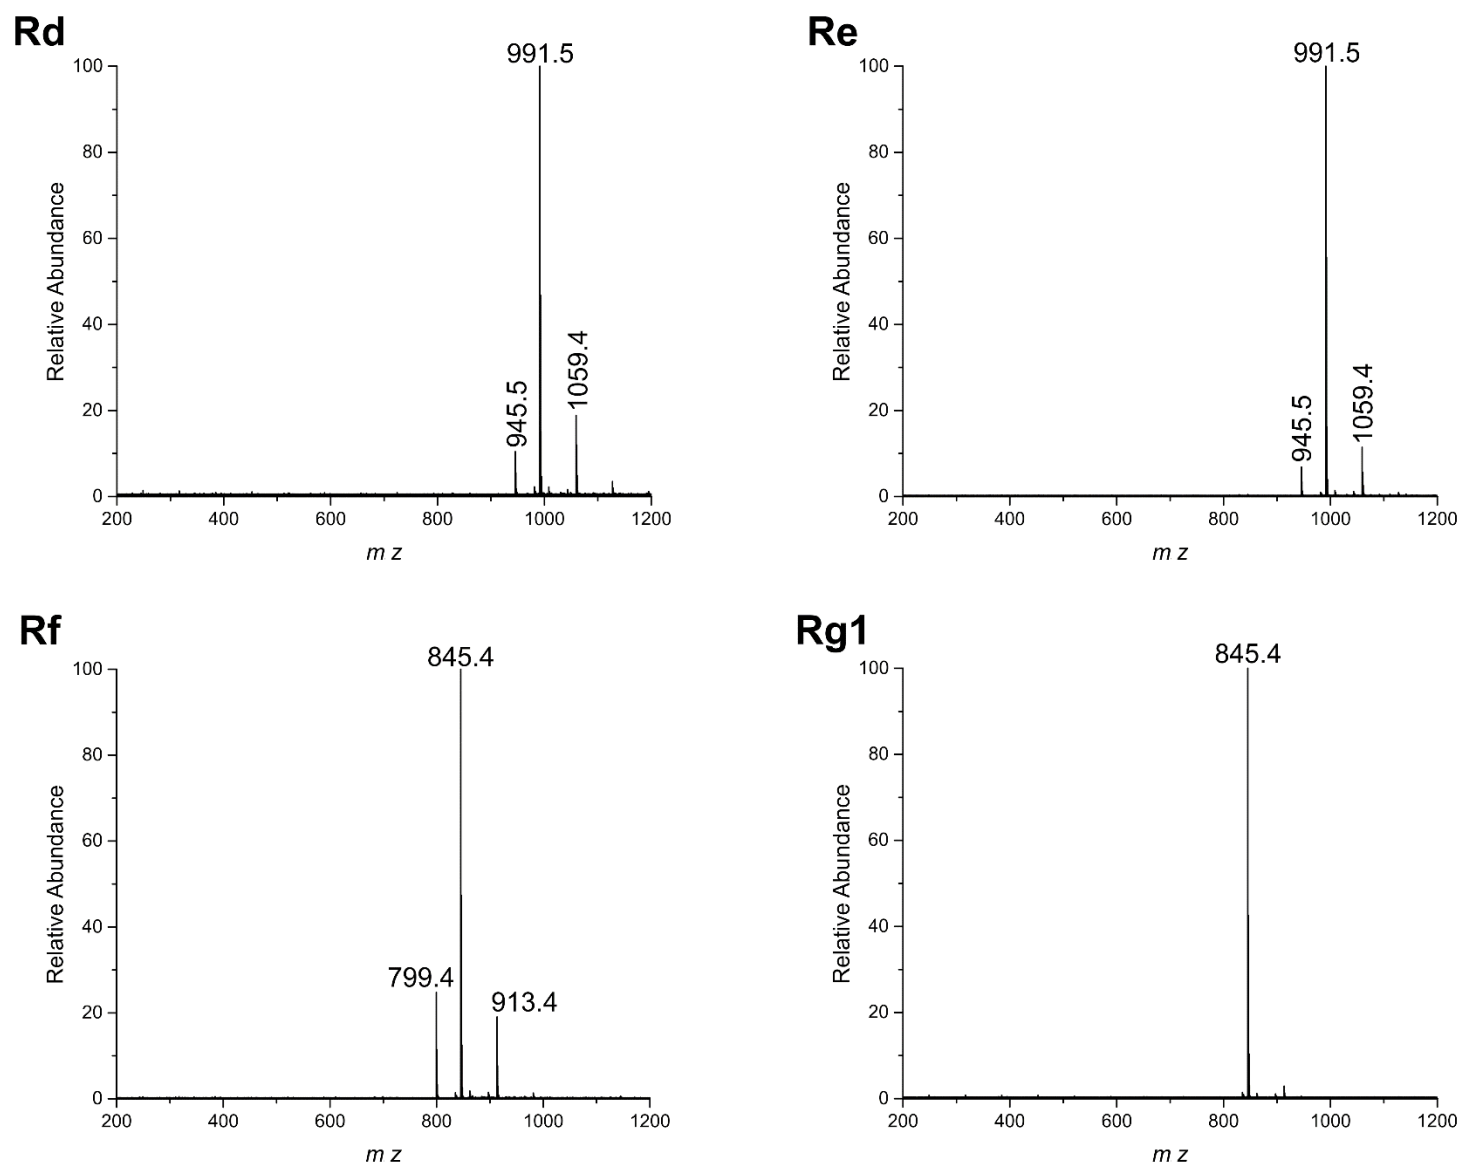

**Fig. S5.** Mass spectra of ginsenoside Rd (1079.29 g/mol), Re (947.17 g/mol), Rf (801.03 g/mol), and Rg1 (801.03 g/mol).

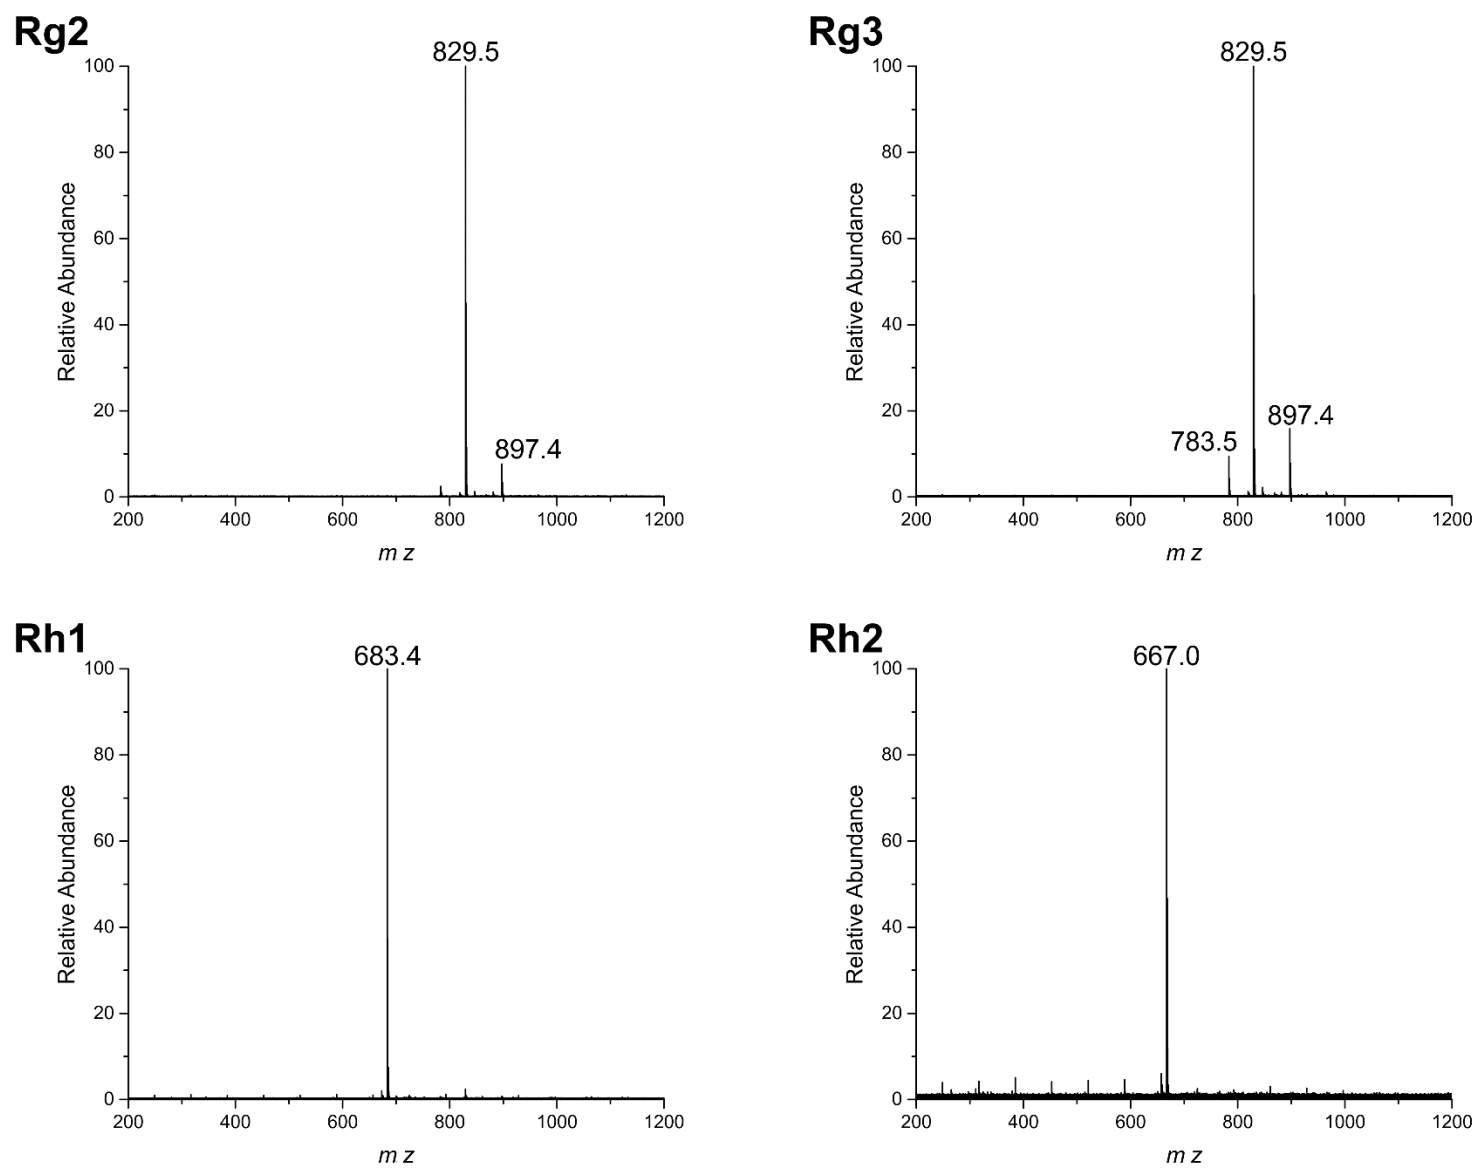

**Fig. S6.** Mass spectra of ginsenoside Rg2 (785.03 g/mol), Rg3 (785.03 g/mol), Rh1 (638.89 g/mol), and Rh2 (622.89 g/mol).



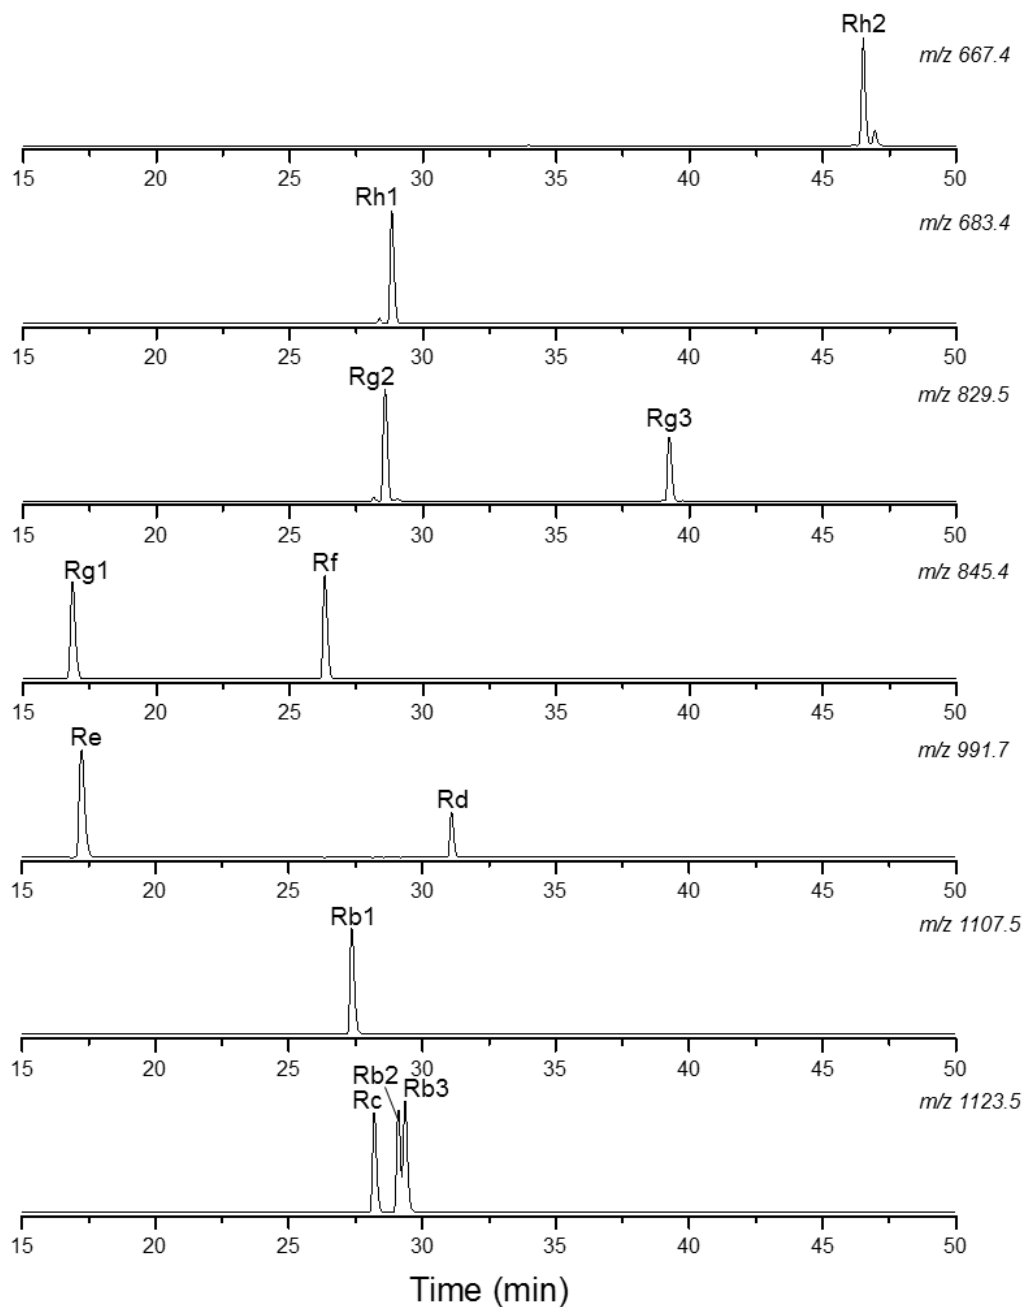

**Figure S7.** LC/MS chromatograms in SIM mode for the 12 ginsenoside mixture under the initial separation conditions. The separation conditions included a 0.7 mL/min flow rate, 25 °C column temperature, and the mobile phase gradient summarized in Table 1.

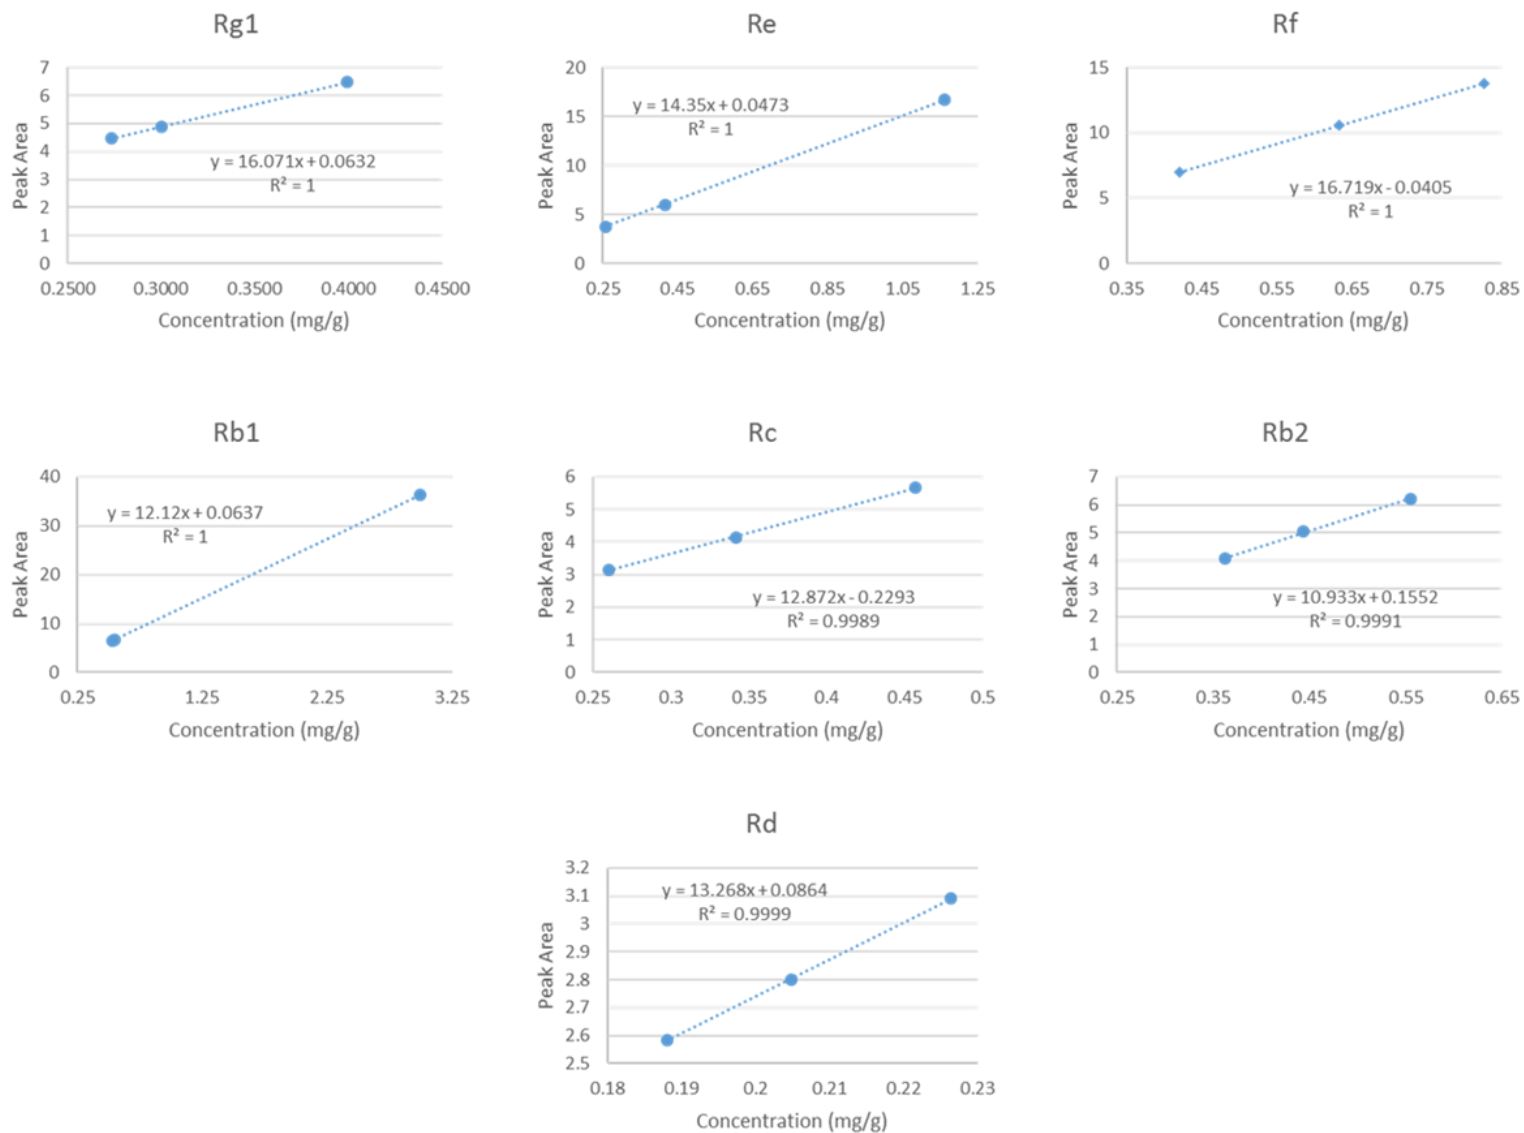

**Figure S8.** Calibration curves for the three calibrants used for the LC/UV measurements of SRM 3389.

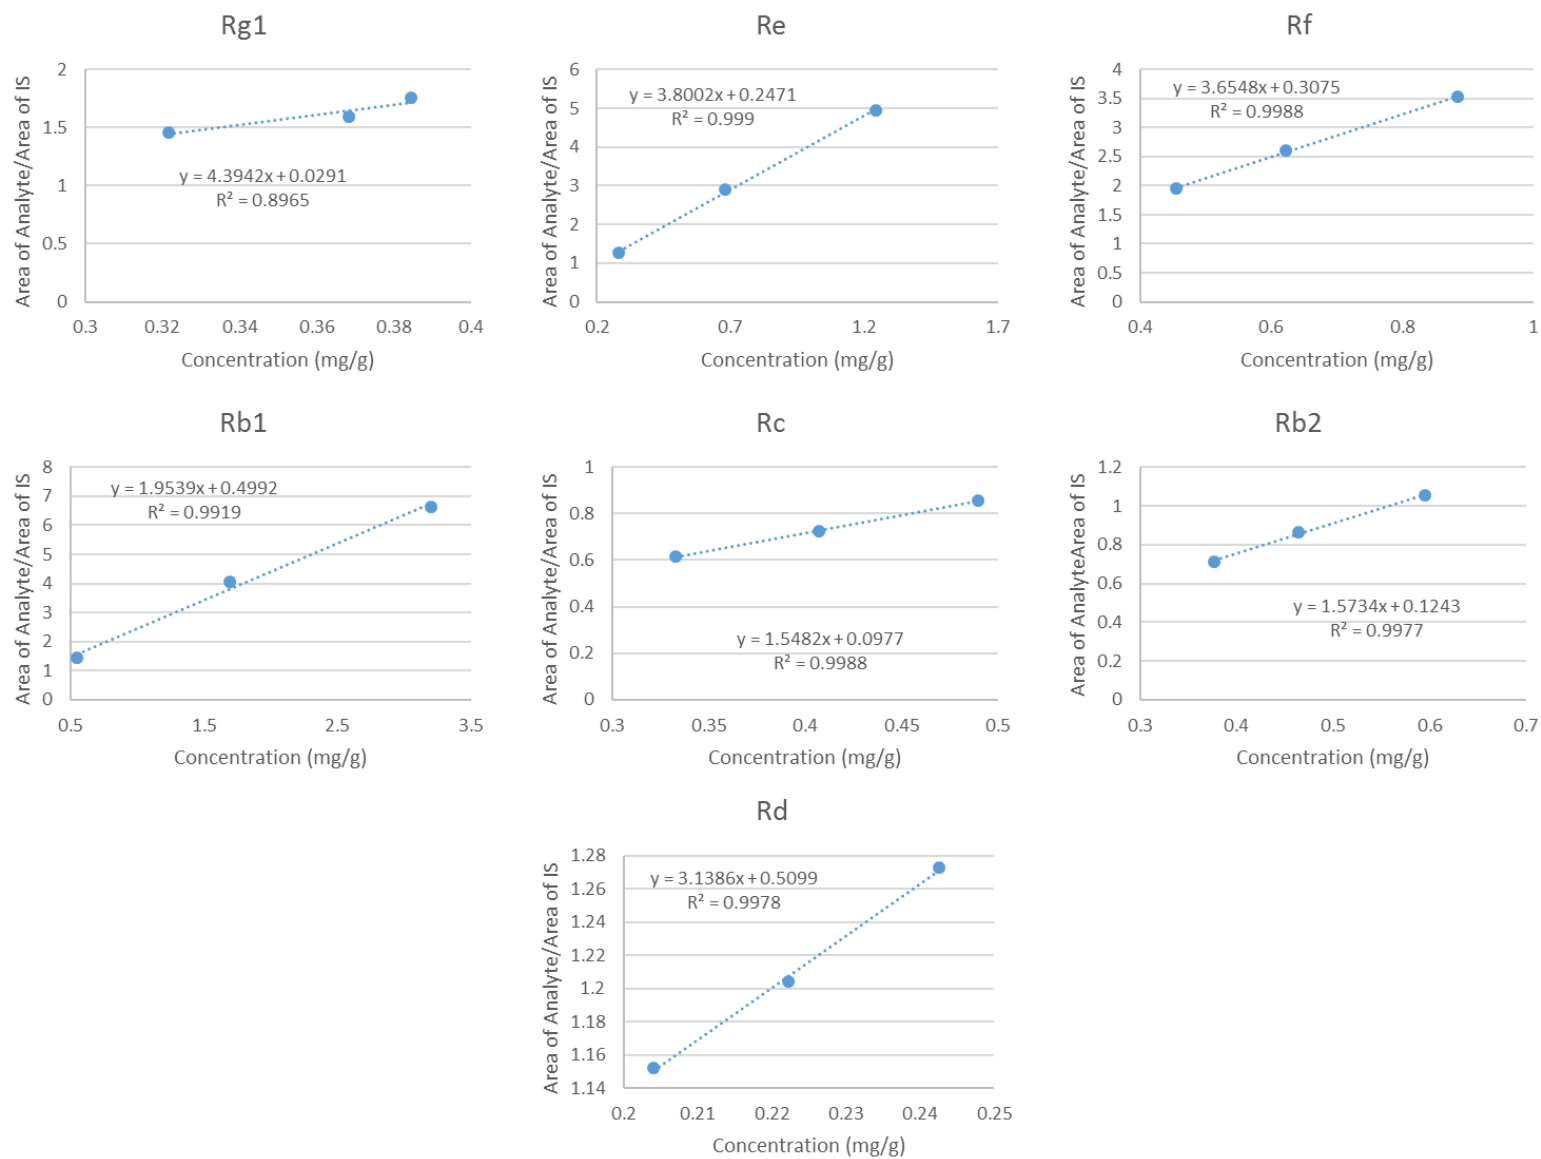

**Figure S9.** Calibration curves for the three calibrants used for the LC/MS measurements of SRM 3389.
